# Supplementary material for: Rescue of hematopoietic stem/progenitor cells formation in plcg1 zebrafish mutant
Source: PubMed Central journal article supplement (PMC6341084; doi:10.1038/s41598-018-36338-8), 2019-01-21

## Supplementary Information

### Rescue of hematopoietic stem/progenitor cells formation in *plcg1* zebrafish mutant.

Karine F. Ferri-Lagneau, Jamil Haider, Shengmin Sang and TinChung Leung

### Supplementary figure legends

**Supplemental Figure S1. Whole-mount *in situ* hybridization of the vein marker *fms*-related tyrosine kinase 4 (*flt4*) in 1dpf embryos. Scale bar = 250µm.**

**Supplemental Figure S2. Ginger promotes various blood lineage markers. A:** Erythroid (*gata.1*), early myeloid (*pu.1*), neutrophil (*mpo*) and myeloid (*lcp1*) lineage markers are evaluated by whole-mount *in situ* at indicated stages. **B:** The lymphoid (pan-leukocyte *cd45* marker) cell fate is also promoted by ginger. Arrows indicate the scattered lymphoid cells over the yolk area. Scale bars = 250µm.

**Supplemental Figure S3. Like SNAP, sodium nitrite (NaNO<sub>2</sub>) can induce NO levels, but has no effect on the CVP. A-C:** Live images of the NO staining by DAF-FM-DA (**A-B**) and the vasculature in *tg(fli1:GFP)* (**C**) in 2dpf embryos. Scale bars = 250µm.

**Supplemental Figure S4. The NO-promoting effect of ginger *in vivo* is dependent on Bmp signaling pathway, but independent of Notch activation. A:** Notch inhibition (LY411575) does not prevent the increase of NO levels induced by ginger at 2dpf. **B-C:** Inhibition of Bmp

signaling pathway (DMH1) decreases the production of NO in the notochord at 2dpf (**B**), whereas it reduces the elevated NO levels induced by ginger throughout the body at 3dpf (**C**). White line indicates the junction of two composite images of the same embryo in (**C**). Scale bars = 250 $\mu$ m.

# Supplemental Figure S1

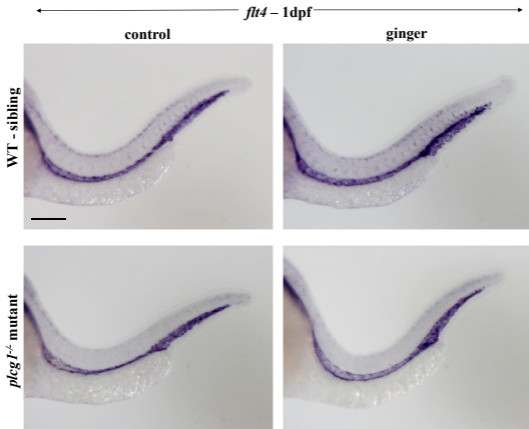

# Supplemental Figure S2

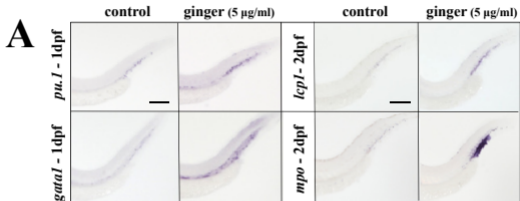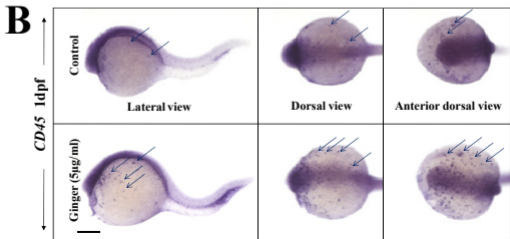

# Supplemental Figure S3

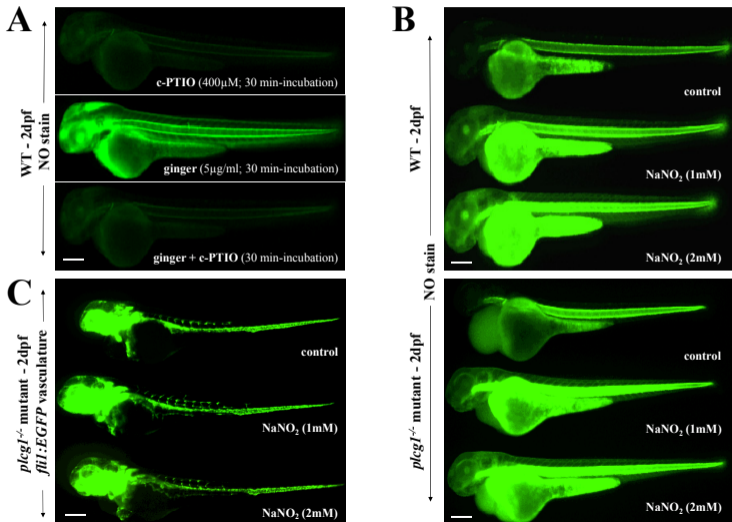

# Supplemental Figure S4

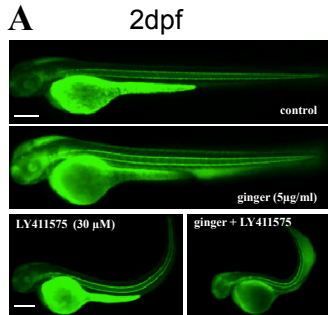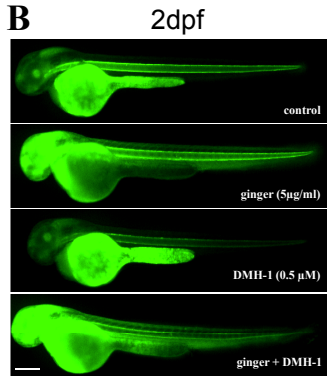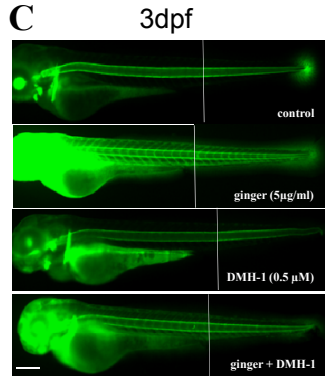

Supplement: 41598_2018_36338_MOESM1_ESM.pdf [file 41598_2018_36338_MOESM1_ESM.pdf]
